# Supplementary material for: Phase I Dose-Escalation and -Expansion Study of the BRAF Inhibitor Encorafenib (LGX818) in Metastatic BRAF -Mutant Melanoma
Source: Oxford University Press journal article supplement (doi:10.1158/1078-0432.ccr-16-2923), 2017-06-13
Supplement: 10780432ccr162923-sup-174890_2_unknown_upload_4046164_nq4kpp.pdf [file 10780432ccr162923-sup-174890_2_unknown_upload_4046164_nq4kpp.pdf]

Table S1. Biochemical and cellular potency of encorafenib, dabrafenib, and vemurafenib in biochemical and cell-based assays. Purified BRAF V600E kinase domain was used in the biochemical experiments, using kinase-dead MEK1 as a substrate and a phosphorylated MEK1 (Ser217/221) alpha-screen readout. A375 cells were incubated with inhibitors for 3 hours to determine the phosphorylated ERK (pERK) half maximal effective concentration (EC<sub>50</sub>) and 72 hours to determine the proliferation EC<sub>50</sub>.

| Inhibitor   | Biochemical                           |                                   | A375 Cells                      |                                          |                                                         |
|-------------|---------------------------------------|-----------------------------------|---------------------------------|------------------------------------------|---------------------------------------------------------|
|             | BRAF V600E IC <sub>50</sub> , $\mu$ M | Dissociation T <sub>1/2</sub> , h | pERK EC <sub>50</sub> , $\mu$ M | Proliferation EC <sub>50</sub> , $\mu$ M | Fold Change pERK EC <sub>50</sub> 3 Hours After Washout |
| Encorafenib | 0.0004                                | > 30                              | 0.003                           | 0.004                                    | 2                                                       |
| Dabrafenib  | 0.00007                               | 2                                 | 0.002                           | 0.017                                    | 14                                                      |
| Vemurafenib | 0.0007                                | 0.5                               | 0.017                           | 0.060                                    | 23                                                      |

EC<sub>50</sub>, half maximal effective concentration; T<sub>1/2</sub>, half-life.
